# Supplementary material for: Origin of an Assemblage Massively Dominated by Carnivorans from the Miocene of Spain
Source: PLoS One. 2013 May 1;8(5):e63046. doi: 10.1371/journal.pone.0063046 (PMC3641116; doi:10.1371/journal.pone.0063046)
Supplement: Table S1 — Skeletal completeness for BAT-1 ULA well-defined taxa. All the elements were used in the estimation of the skeletal completeness. (XLS) [file pone.0063046.s012.xls]

## Sheet: Hoja1
Table S1. Skeletal completeness for BAT-1 ULA well-defined taxa.
		% Skeletal completeness
	Magericyon anceps	2.46
	Protictitherium crassum	0.73
	Simocyon batalleri	0.73
	Hipparion sp.	7.42
	Rhinocerotidae undet.	0.42
	Microstonyx sp.	0.75
	Tetralophodon longirostris	2.68
All the elements were used in the estimation of the skeletal completeness.
